# Supplementary material for: Effect of Graphene Addition on the Thermal and Persistent Luminescence Properties of Gd2.994Ce0.006Ga3Al2O12 and Gd2.964Ce0.006Dy0.03Ga3Al2O12 Ceramics
Source: MDPI journal article supplement (doi:10.3390/ma15072606), 2022-04-01
Supplement: s1 [file s1]

# Effect of Graphene Addition on the Thermal and Persistent Luminescence Properties of $\text{Gd}_{2.994}\text{Ce}_{0.006}\text{Ga}_3\text{Al}_2\text{O}_{12}$ and $\text{Gd}_{2.964}\text{Ce}_{0.006}\text{Dy}_{0.03}\text{Ga}_3\text{Al}_2\text{O}_{12}$ Ceramics

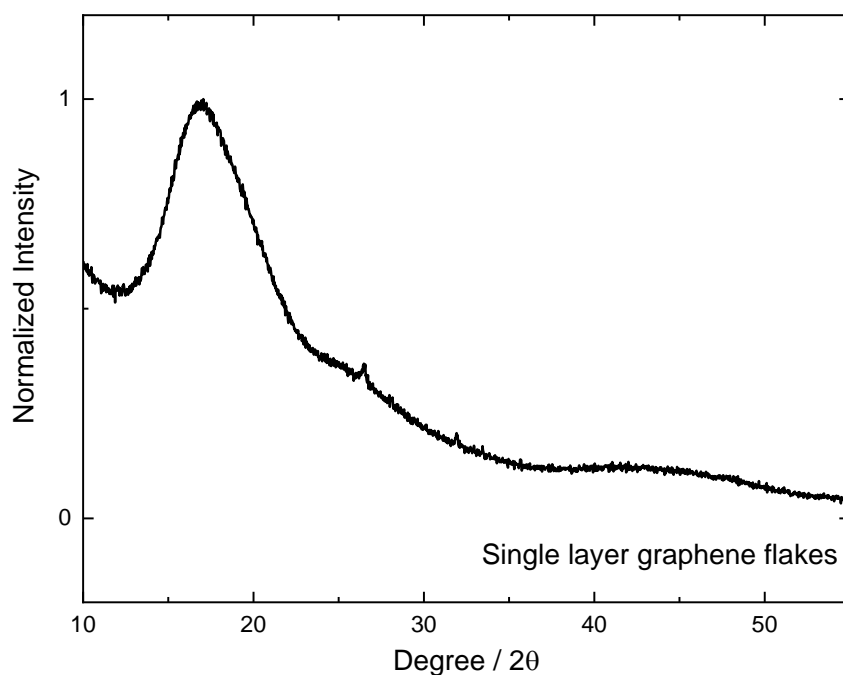

Figure S1. XRD of commercial single layer graphene flakes.

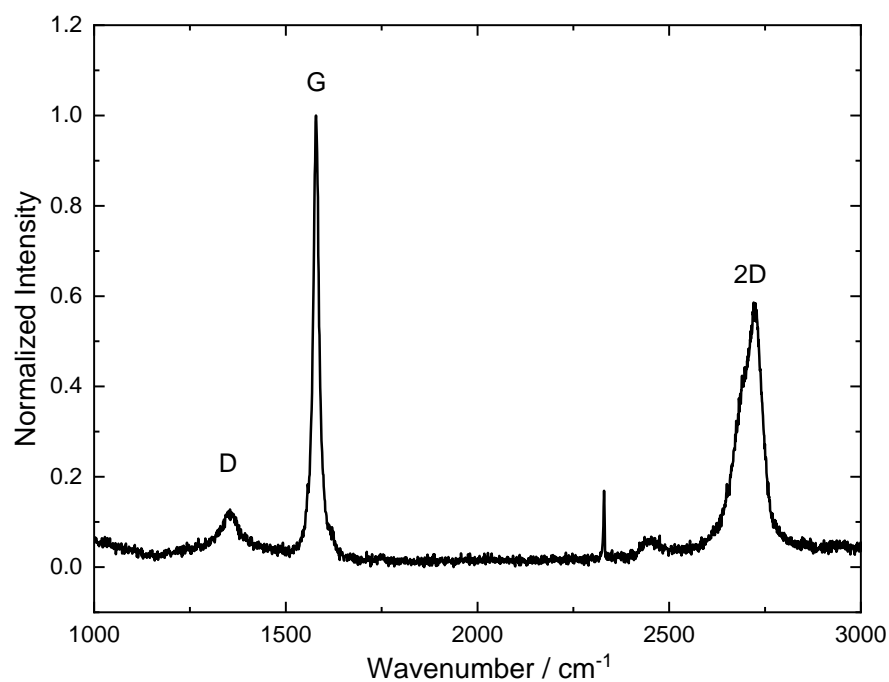

Figure S2. Raman spectrum of commercial single layer graphene flakes.

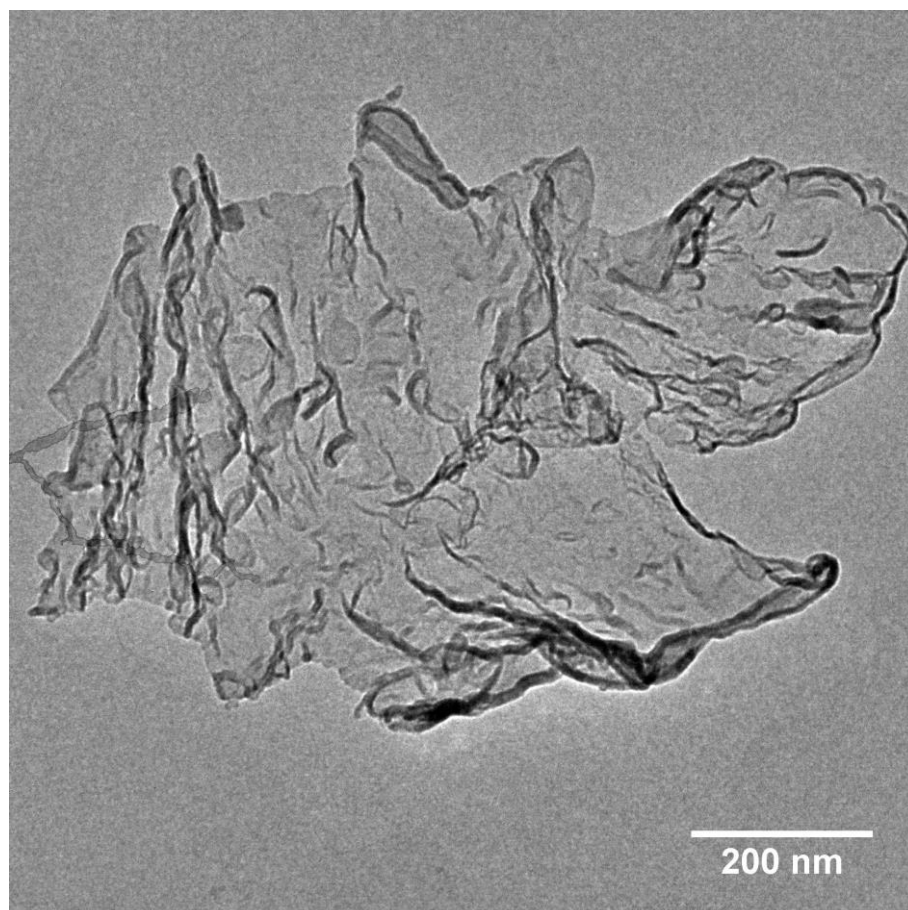

**Figure S3.** TEM image of commercial single layer graphene flake.
